# Supplementary material
Source: PubMed Central journal article supplement (PMC124320)
Supplement: pnas_99_13_8585__1.pdf [file pnas_99_13_8585__1.pdf]

**Table 1.** Yeast strains and plasmids

| Name      | Genotype                                                                                                                                                                                                                                                                                    | Source or reference                |
|-----------|---------------------------------------------------------------------------------------------------------------------------------------------------------------------------------------------------------------------------------------------------------------------------------------------|------------------------------------|
| PCLDa     | <i>Mata ade2-1 can1-100 his3-12,16 leu2-3,112 trp1-1 ura3-1 hsp82::LEU2 hsc82::LEU2</i>                                                                                                                                                                                                     | Nathan and Lindquist 1995          |
| 281       | <i>Mata ade1 ade2 ura1 his7 lys2 tyr1 gal1 cdc16-1</i>                                                                                                                                                                                                                                      | Hartwell et al.1970                |
| 314       | <i>Mata ade1 ade2 ura1 his7 lys2 tyr1 gal1 cdc4-1</i>                                                                                                                                                                                                                                       | Hartwell et al.1970                |
| 374       | <i>Mata ade2 ura1 his7 lys2 tyr1 gal1 cdc4-2</i>                                                                                                                                                                                                                                            | Hartwell et al.1970                |
| 9031g     | <i>Mata ade1 ade2 ade5 ura1 his7 lys2 tyr1 gal1 cdc23-1</i>                                                                                                                                                                                                                                 | Hartwell et al.1970                |
| E3-16     | <i>Mata ade1 ade2 ura1 his7 tyr1 gal1 cdc34-1</i>                                                                                                                                                                                                                                           | Hartwell et al.1970                |
| JK421     | <i>Mata ura3-52 lys2-801 trp1D63 his3D200 leu2D1 ndc10-1</i>                                                                                                                                                                                                                                | Goh and Kilmartin 1993             |
| K7770     | <i>Mat<math>\alpha</math>. ade2-101 trp1-<math>\Delta</math>63 leu2-3,112 ura3-52 his3-<math>\Delta</math>200 lys2-801 cse4-1</i>                                                                                                                                                           | T.Tanaka and K.Nasmyth unpublished |
| K7772     | <i>Mata his3-11 ura3-52 leu2-3,112 mif2-3, scc1::SCC1-myc18:TRP1</i>                                                                                                                                                                                                                        | T.Tanaka and K.Nasmyth unpublished |
| s30       | <i>Mat<math>\alpha</math>. ade2-101 trp1-<math>\Delta</math>1 leu2-<math>\Delta</math>1 ura3-52 his3-<math>\Delta</math>200 lys2-801ctf13-30</i>                                                                                                                                            | Doheny et al. 1993                 |
| YJL106    | <i>Mat<math>\alpha</math>. ade2-101 trp1-<math>\Delta</math>63 leu2-<math>\Delta</math>1 ura3-52 his3-<math>\Delta</math>200 lys2-801 cyh2<sup>R</sup> skp1-51:HIS3</i>                                                                                                                     | this study                         |
| YJL158    | <i>Mata ade2-101 trp1-<math>\Delta</math>63 leu2-<math>\Delta</math>1 ura3-52 his3-<math>\Delta</math>200 lys2-801 cyh2 okp1::okp1-5:HIS3</i>                                                                                                                                               | Ortiz et al. 1999                  |
| YJL20     | <i>Mat<math>\alpha</math>. ade2-101 trp1-<math>\Delta</math>63 leu2-<math>\Delta</math>1 ura3-52 his3-<math>\Delta</math>200 lys2-801 cyh2<sup>R</sup></i>                                                                                                                                  | spore of YTF3                      |
| YJL33     | <i>Mata ade2-101 trp1-<math>\Delta</math>63 leu2-<math>\Delta</math>1 ura3-52 his3-<math>\Delta</math>200 lys2-801 cyh2<sup>R</sup> ctf13::TRP1</i>                                                                                                                                         | Stemmann and Lechner 1996          |
| YOS71     | <i>Mat<math>\alpha</math>. ade2-101 trp1-<math>\Delta</math>63 leu2-<math>\Delta</math>1 ura3-52 his3-<math>\Delta</math>200 lys2-801 skp1::HIS3</i>                                                                                                                                        | Stemmann and Lechner 1996          |
| YPH1161   | <i>Mat<math>\alpha</math>. ade2-101 trp1-<math>\Delta</math>63 leu2-<math>\Delta</math>1 ura3-52 his3-<math>\Delta</math>200 lys2-801 skp1<math>\Delta</math>1::TRP1 LEU2::skp1-4</i>                                                                                                       | Connelly and Hieter 1996           |
| YPH1172   | <i>Mat<math>\alpha</math>. ade2-101 trp1-<math>\Delta</math>63 leu2-<math>\Delta</math>1 ura3-52 his3-<math>\Delta</math>200 lys2-801 skp1<math>\Delta</math>1::TRP1 LEU2::skp1-3</i>                                                                                                       | Connelly and Hieter 1996           |
| YTF3      | <i>Mata/Mat<math>\alpha</math>. ade2-101/ade2-101 trp1-<math>\Delta</math>63/trp1-<math>\Delta</math>63 leu2-<math>\Delta</math>1/leu2-<math>\Delta</math>1 ura3-52/ura3-52 his3-<math>\Delta</math>200/his3-<math>\Delta</math>200 lys2-801/lys2-801 cyh2<sup>R</sup>/cyh2<sup>R</sup></i> | J. Hegemann unpublished            |
| pET16b    | E. coli. expression vector                                                                                                                                                                                                                                                                  | Novagene                           |
| pJL114    | <i>CTF13</i> in pRS416                                                                                                                                                                                                                                                                      | Stemmann and Lechner 1996          |
| pJL218    | <i>CTF13</i> promoter- <i>ProA-CTF13</i> in pRS415                                                                                                                                                                                                                                          | this study                         |
| pJL248    | <i>SKP1</i> in pRS414                                                                                                                                                                                                                                                                       | this study                         |
| pJL428    | $\Delta^{38-64}$ <i>SKP1</i> in pRS414                                                                                                                                                                                                                                                      | this study                         |
| pNevN-Leu | 2 $\mu$ <i>LEU2 PMA1</i> promoter                                                                                                                                                                                                                                                           | Sauer and Stolz 1994               |
| pNevN-Ura | 2 $\mu$ <i>URA3 PMA1</i> promoter                                                                                                                                                                                                                                                           | Sauer and Stolz 1994               |
| pOS152    | <sup>His</sup> <i>CTF13</i> in pNevN-Leu                                                                                                                                                                                                                                                    | Stemmann and Lechner 1996          |
| pOS221    | <i>SKP1</i> in pRS416                                                                                                                                                                                                                                                                       | Stemmann and Lechner 1996          |
| pOS234    | <sup>His</sup> <i>SKP1</i> and <sup>His</sup> <i>CTF13</i> in pET16b                                                                                                                                                                                                                        | this study                         |
| pOS237    | <sup>Flag</sup> <i>SKP1</i> in pSPUTK                                                                                                                                                                                                                                                       | this study                         |
| pOS253    | <sup>His</sup> <i>SKP1</i> in pNevN-URA                                                                                                                                                                                                                                                     | this study                         |
| pOS643    | <i>ProA</i> - <sup>216-229</sup> <i>CTF13</i> in pRS415                                                                                                                                                                                                                                     | this study                         |
| pOS86     | <i>CTF13</i> in pSPUTK                                                                                                                                                                                                                                                                      | this study                         |
| pRS314    | <i>ARS CEN6 TRP1</i>                                                                                                                                                                                                                                                                        | Sikorski and Hieter 1989           |
| pRS414    | <i>ARS CEN6 TRP1</i>                                                                                                                                                                                                                                                                        | Sikorski and Hieter 1989           |
| pRS415    | <i>ARS CEN6 LEU2</i>                                                                                                                                                                                                                                                                        | Sikorski and Hieter 1989           |
| pRS416    | <i>ARS CEN6 URA3</i>                                                                                                                                                                                                                                                                        | Sikorski and Hieter 1989           |
| pSPUTK    | vector for in vitro transcription, SP6 promoter                                                                                                                                                                                                                                             | Stratagene                         |
