# Supplementary material
Source: PubMed Central journal article supplement (PMC124320)
Supplement: pnas_99_13_8585__5.pdf [file pnas_99_13_8585__5.pdf]

**Sgt1p:** 2 PVEKDL----KTAYKA-----LYDEKEPLKALHLYDEILKGSPTNLTAL  
P+E+DL K A K Y +K+ AL YD+ + PTN+T +

**hHOP:** 213 PMEEDLPENKKQALKEKELGNDAYKKKDFDTALKHYDKAKELDPTNMTYI

**Sgt1p:** 42 IFKAACLEKLYFGFSDWHS DATMENAKELLDKAL-MTAEGRGDRSKIGLV  
+AA +YF D++ +EL +KA+ + E R D +I

**hHOP:** 263 TNQAA----VYFEKGDYN-----KCRELCEKAIEV GRE NRE DYR QI AKA

**Sgt1p:** 91 NFR----YF-----VHFFN-----IKDYELAQSYFKKAKNL  
R YF +HF+N +K + A+ K+ + L

**hHOP:** 303 YARIGNSYFKK EKYKDAIHFY NKSLAEHRTPDVLK K CQQA EKILKEQERL

**Sgt1p:**118 GYVDDTLPLWE 128  
Y++ L L E

**hHOP:** 353 AYINPDLALEE 363
