# Supplementary material
Source: PubMed Central journal article supplement (PMC124320)

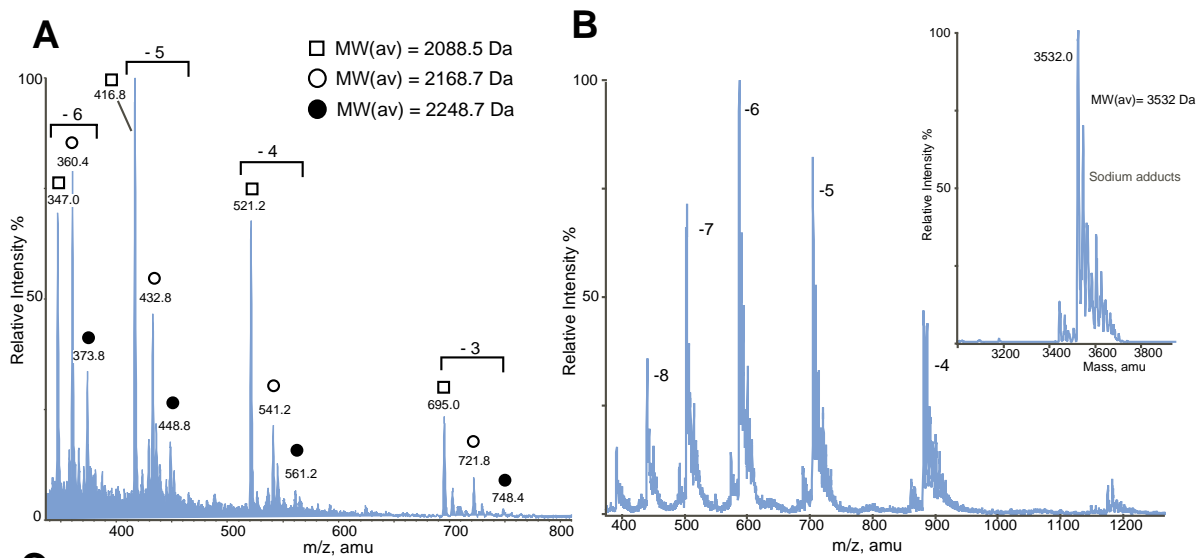

**C**

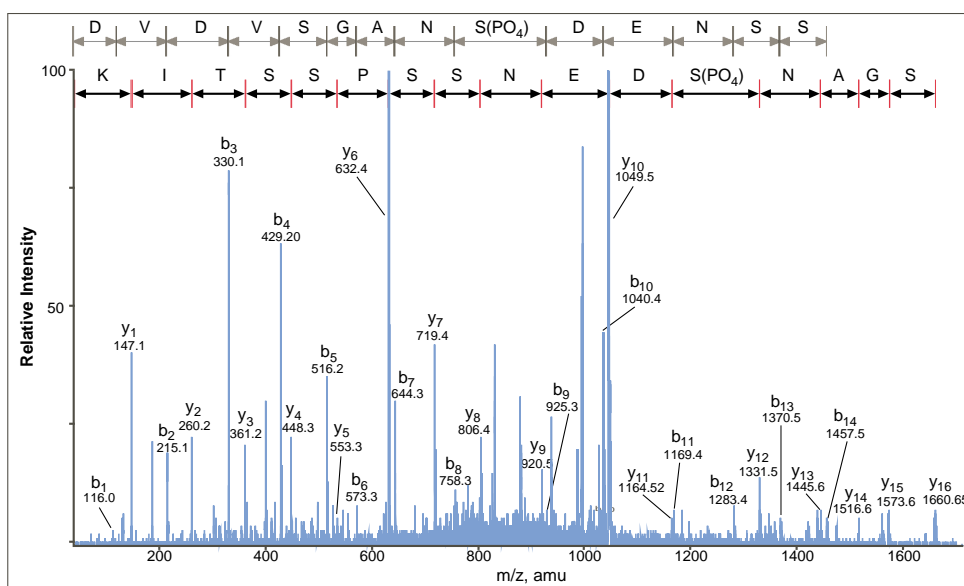

**D**

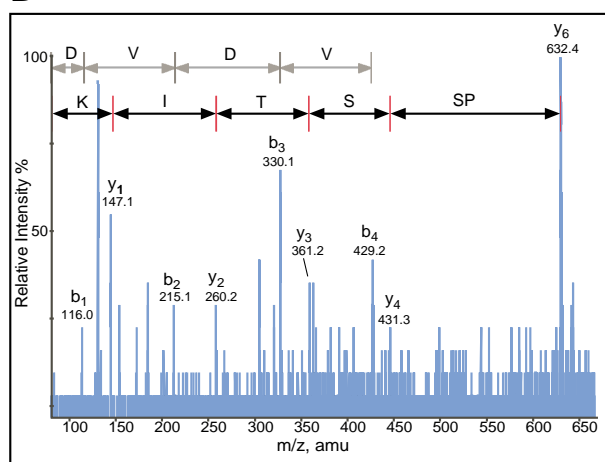

**E**

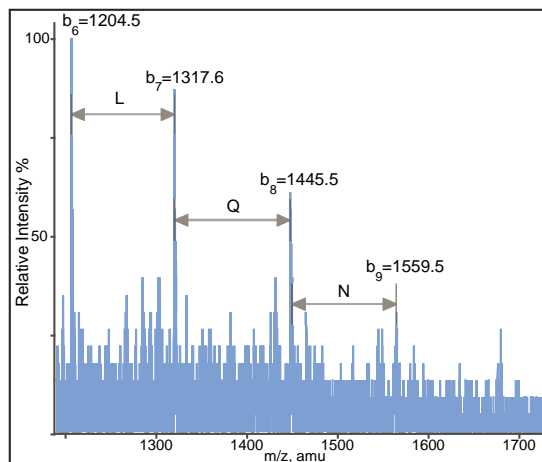

Supplement: pnas_99_13_8585__4.pdf [file pnas_99_13_8585__4.pdf]
